# Supplementary material for: CT Morphological Features Integrated With Whole-Lesion Histogram Parameters to Predict Lung Metastasis for Colorectal Cancer Patients With Pulmonary Nodules
Source: PubMed Central journal article supplement (PMC6877751; doi:10.3389/fonc.2019.01241), 2019-11-19
Supplement: Presentation_1.pdf [file Presentation_1.pdf]

## Supplementary Material

Figure 1

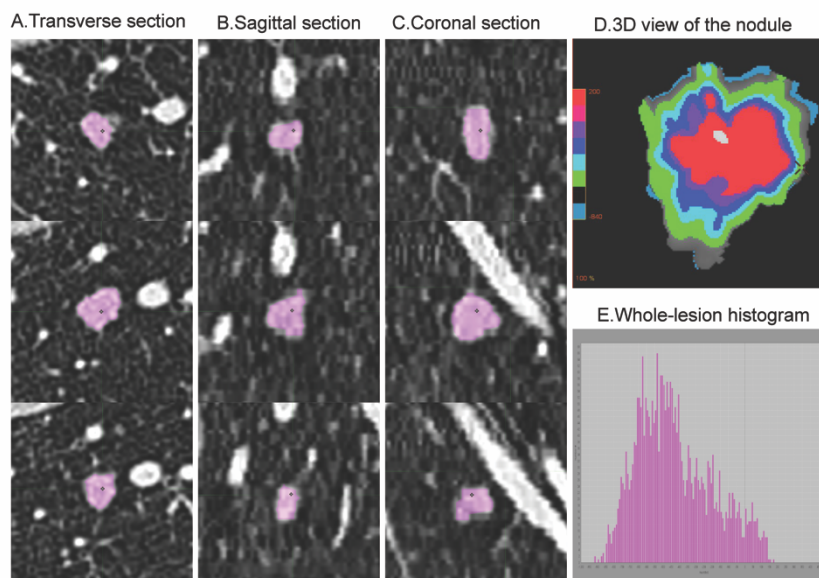

An example of ROI delineation.

Table S1 Definition of CT morphological features

| Characteristics          | Definition and scoring                                                                                 |
|--------------------------|--------------------------------------------------------------------------------------------------------|
| <b>CLINICAL FEATURES</b> |                                                                                                        |
| <b>Age</b>               | Patients' age when the pulmonary nodule was firstly detected by CT examination                         |
| <b>Gender</b>            | Patients' gender                                                                                       |
| <b>1</b>                 | Male                                                                                                   |
| <b>2</b>                 | Female                                                                                                 |
| <b>Primary tumor</b>     | Location of colorectal cancer                                                                          |
| <b>1</b>                 | Left colon                                                                                             |
| <b>2</b>                 | Right colon                                                                                            |
| <b>3</b>                 | Rectum                                                                                                 |
| <b>LOCATION</b>          |                                                                                                        |
| <b>Distribution</b>      | Central location(>2cm away from the pleural) or peripheral location( $\leq$ 2cm away from the pleural) |
| <b>1</b>                 | Central location                                                                                       |
| <b>2</b>                 | peripheral location                                                                                    |
| <b>Lobe location</b>     | Lobe location of the tumor                                                                             |
| <b>1</b>                 | Right upper lobe                                                                                       |
| <b>2</b>                 | Right middle lobe                                                                                      |
| <b>3</b>                 | Right lower lobe                                                                                       |

|                            |                                                                               |
|----------------------------|-------------------------------------------------------------------------------|
| 4                          | Left upper lobe                                                               |
| 5                          | Left lower lobe                                                               |
| <b>Nodules number</b>      | Nodules with the longest diameter $\geq 5$ mm were counted                    |
| 1                          | One nodule                                                                    |
| 2                          | Double nodules                                                                |
| 3                          | Multiple nodules                                                              |
| <b>SIZE CATEGORY</b>       |                                                                               |
| <b>Size</b>                | The largest length of the target lesion                                       |
| 1                          | 5-10mm                                                                        |
| 2                          | 11-15mm                                                                       |
| 3                          | 16-20mm                                                                       |
| <b>Long-axis diameter</b>  | Longest diameter of the tumor                                                 |
| <b>Short-axis diameter</b> | Longest perpendicular diameter in the same section                            |
| <b>ATTENUATION</b>         |                                                                               |
| <b>Density</b>             | Solid nodule or ground-glass opacity(GGO)                                     |
| 1                          | Pure GGO                                                                      |
| 2                          | Mixed GGO                                                                     |
| 3                          | Solid nodule                                                                  |
| <b>Calcification</b>       | Any patterns of calcification in the tumor                                    |
| 0                          | No                                                                            |
| 1                          | Yes                                                                           |
| <b>SHAPE</b>               |                                                                               |
| <b>Contour</b>             | The overall shape of roundness                                                |
| 1                          | Round-like contour                                                            |
| 2                          | Oval-like contour                                                             |
| 3                          | Somewhat irregular                                                            |
| 4                          | Irregular                                                                     |
| <b>Lobulation</b>          | A portion of a lesion's surface that showed a wavy or scalloped configuration |
| 0                          | None                                                                          |
| 1                          | Lobulation number less than 3                                                 |
| 2                          | Lobulation number between 4 and 6                                             |
| 3                          | Lobulation number more than 6                                                 |
| <b>Border</b>              | Well- or ill-defined border                                                   |
| 1                          | Well defined border                                                           |
| 2                          | Everything else between 1 and 3                                               |
| 3                          | Poorly defined border                                                         |
| <b>Spiculation</b>         | Lines radiating from the margins of the tumor                                 |
| 0                          | None                                                                          |
| 1                          | Fine spiculation                                                              |
| 2                          | Coarse spiculation                                                            |

|                                       |                                                                                        |
|---------------------------------------|----------------------------------------------------------------------------------------|
| <b><i>INTERNAL<br/>STRUCTURE</i></b>  |                                                                                        |
| <b>Air bronchogram</b>                | Tubelike or branched air structure within the tumor                                    |
| <b>0</b>                              | No                                                                                     |
| <b>1</b>                              | Yes                                                                                    |
| <b>Concavity</b>                      | Concave cuts                                                                           |
| <b>0</b>                              | None                                                                                   |
| <b>1</b>                              | Slight concavity                                                                       |
| <b>2</b>                              | Deep concavity                                                                         |
| <b>Vocule sign</b>                    | The presence of air in the tumor                                                       |
| <b>0</b>                              | No                                                                                     |
| <b>1</b>                              | Yes                                                                                    |
| <b><i>ADJACNET FINDINGS</i></b>       |                                                                                        |
| <b>Fissure attachment</b>             | Nodule attaches to the fissure                                                         |
| <b>0</b>                              | No                                                                                     |
| <b>1</b>                              | Yes                                                                                    |
| <b>Pleural attachment</b>             | Nodule attaches to the pleura other than fissure                                       |
| <b>0</b>                              | No                                                                                     |
| <b>1</b>                              | Yes                                                                                    |
| <b>Pleural retraction</b>             | Retraction of the pleura toward the nodule                                             |
| <b>0</b>                              | No                                                                                     |
| <b>1</b>                              | Yes                                                                                    |
| <b><i>ASSOCIATED<br/>FEATURES</i></b> |                                                                                        |
| <b>Vascular convergence</b>           | Convergence of vessels to the tumor                                                    |
| <b>0</b>                              | No                                                                                     |
| <b>1</b>                              | Yes                                                                                    |
| <b>Lymphadenopathy</b>                | Thoracic lymph nodes (hilar or mediastinal) with short-axis diameter greater than 1 cm |
| <b>0</b>                              | No                                                                                     |
| <b>1</b>                              | Yes                                                                                    |
| <b>Enhancement degree</b>             | Degree of enhancement on contrast-enhanced CT images(lesion CT value/Aorta CT value)   |

**Table S2 Comparison between primary cohort and validation cohort**

| <b>Characteristics</b>     | <b>Primary cohort</b> | <b>Validation cohort</b> | <b>p</b> |
|----------------------------|-----------------------|--------------------------|----------|
| <b>Metastasis</b>          |                       |                          | 0.365    |
| 0                          | 73(53.7%)             | 28(46.7%)                |          |
| 1                          | 63(46.3%)             | 32(53.3%)                |          |
| <b>Age</b>                 | 59.06±10.912          | 57.22±10.612             | 0.273    |
| <b>Gender</b>              |                       |                          | 0.741    |
| 1                          | 76(55.9%)             | 32(53.3%)                |          |
| 2                          | 60(44.1%)             | 28(46.7%)                |          |
| <b>Primary tumor</b>       |                       |                          | 0.685    |
| 1                          | 32(23.5%)             | 15(25.0%)                |          |
| 2                          | 25(18.4%)             | 8(13.3%)                 |          |
| 3                          | 79(58.1%)             | 37(61.7%)                |          |
| <b>Distribution</b>        |                       |                          | 0.805    |
| 1                          | 102(75.0%)            | 44(73.3%)                |          |
| 2                          | 34(25.0%)             | 16(26.7%)                |          |
| <b>Lobe location</b>       |                       |                          | 0.263    |
| 1                          | 31(22.8%)             | 13(21.7%)                |          |
| 2                          | 22(16.2%)             | 14(23.3%)                |          |
| 3                          | 32(23.5%)             | 13(21.7%)                |          |
| 4                          | 17(12.5%)             | 2(3.3%)                  |          |
| 5                          | 34(25.0%)             | 18(30.0%)                |          |
| <b>Nodules number</b>      |                       |                          | 0.689    |
| 1                          | 57(41.9%)             | 22(36.7%)                |          |
| 2                          | 33(24.3%)             | 14(23.3%)                |          |
| 3                          | 46(33.8%)             | 24(40.0%)                |          |
| <b>Size category</b>       |                       |                          | 0.916    |
| 1                          | 78(57.4%)             | 34(56.7%)                |          |
| 2                          | 34(25.0%)             | 14(23.3%)                |          |
| 3                          | 24(17.6%)             | 12(20.0%)                |          |
| <b>Long-axis diameter</b>  | 10.690±4.242          | 10.607±4.454             | 0.901    |
| <b>Short-axis diameter</b> | 7.579±6.736           | 7.017±2.903              | 0.536    |
| <b>Density</b>             |                       |                          | 0.948    |
| 1                          | 12(8.8%)              | 6(10.0%)                 |          |
| 2                          | 17(12.5%)             | 8(13.3%)                 |          |
| 3                          | 107(78.7%)            | 46(76.7%)                |          |
| <b>Calcification</b>       |                       |                          | 0.602    |
| 0                          | 132(97.1%)            | 59(98.3%)                |          |
| 1                          | 4(2.9%)               | 1(1.7%)                  |          |
| <b>Contour</b>             |                       |                          | 0.066    |
| 1                          | 12(8.8%)              | 2(3.3%)                  |          |

|                             |            |           |        |
|-----------------------------|------------|-----------|--------|
| 2                           | 41(30.1%)  | 10(16.7%) |        |
| 3                           | 48(35.3%)  | 30(50.0%) |        |
| 4                           | 35(25.7%)  | 18(30.0%) |        |
| <b>Lobulation</b>           |            |           | 0.761  |
| 0                           | 66(48.5%)  | 25(41.7%) |        |
| 1                           | 35(25.7%)  | 16(26.7%) |        |
| 2                           | 20(14.7%)  | 12(20.0%) |        |
| 3                           | 15(11.0%)  | 7(11.7%)  |        |
| <b>Border</b>               |            |           | 0.954  |
| 1                           | 30(22.1%)  | 14(23.3%) |        |
| 2                           | 67(49.3%)  | 30(50.0%) |        |
| 3                           | 39(28.7%)  | 16(26.7%) |        |
| <b>Spiculation</b>          |            |           | 0.276  |
| 0                           | 76(55.9%)  | 39(65.0%) |        |
| 1                           | 58(42.6%)  | 19(31.7%) |        |
| 2                           | 2(1.5%)    | 2(3.3%)   |        |
| <b>Air bronchogram</b>      |            |           | 0.576  |
| 0                           | 129(94.9%) | 58(96.7%) |        |
| 1                           | 7(5.1%)    | 2(3.3%)   |        |
| <b>Concavity</b>            |            |           | 0.739  |
| 0                           | 105(77.2%) | 49(81.7%) |        |
| 1                           | 16(11.8%)  | 5(8.3%)   |        |
| 2                           | 15(11.0%)  | 6(10.0%)  |        |
| <b>Vocule sign</b>          |            |           | 0.663  |
| 0                           | 105(77.2%) | 48(80.0%) |        |
| 1                           | 31(22.8%)  | 12(20.0%) |        |
| <b>Fissure attachment</b>   |            |           | 0.793  |
| 0                           | 124(91.2%) | 54(90.0%) |        |
| 1                           | 12(8.8%)   | 6(10.0%)  |        |
| <b>Pleural attachment</b>   |            |           | 0.023* |
| 0                           | 84(61.8%)  | 47(78.3%) |        |
| 1                           | 52(38.2%)  | 13(21.7%) |        |
| <b>Pleural retraction</b>   |            |           | 0.564  |
| 0                           | 111(81.6%) | 51(85.0%) |        |
| 1                           | 25(18.4%)  | 9(15.0%)  |        |
| <b>Vascular convergence</b> |            |           | 0.884  |
| 0                           | 71(52.2%)  | 32(53.3%) |        |
| 1                           | 65(47.8%)  | 28(46.7%) |        |
| <b>Lymphadenopathy</b>      |            |           | 0.67   |
| 0                           | 129(94.9%) | 56(93.3%) |        |
| 1                           | 7(5.1%)    | 4(6.7%)   |        |

|                           |                  |                  |       |
|---------------------------|------------------|------------------|-------|
| <b>Enhancement degree</b> | 0.043±0.463      | 0.151±1.127      | 0.344 |
| <b>S-ASD</b>              | -2.942±12.810    | -0.818±8.057     | 0.238 |
| <b>S-STD</b>              | 149.474±85.925   | 130.025±63.189   | 0.117 |
| <b>S-Average ratio</b>    | 0.853±1.174      | 0.774±0.911      | 0.645 |
| <b>S-Mean</b>             | -138.862±335.183 | -54.635±129.725  | 0.061 |
| <b>S-Skewness</b>         | -0.348±1.077     | -0.357±1.148     | 0.96  |
| <b>S-Kurtosis</b>         | 1.068±4.083      | 1.558±4.781      | 0.465 |
| <b>S-Area</b>             | 0.988±0.448      | 0.973±0.426      | 0.818 |
| <b>S-Volume</b>           | 0.853±1.174      | 0.774±0.911      | 0.645 |
| <b>S-Median</b>           | -168.560±284.811 | -155.480±256.045 | 0.76  |
| <b>S-Maximum</b>          | 174.650±350.718  | 162.680±416.102  | 0.836 |
| <b>S-Minimum</b>          | -617.740±246.002 | -574.920±257.463 | 0.27  |
| <b>W-ASD</b>              | 296.735±678.869  | 207.384±249.451  | 0.324 |
| <b>W-STD</b>              | 149.620±85.682   | 129.695±63.118   | 0.107 |
| <b>W-Average ratio</b>    | 1.261±0.589      | 1.240±0.501      | 0.813 |
| <b>W-Mean</b>             | -174.432±263.197 | -166.792±242.295 | 0.848 |
| <b>W-Skewness</b>         | -0.360±1.035     | -0.344±1.157     | 0.923 |
| <b>W-Kurtosis</b>         | 3.937±3.912      | 4.554±4.878      | 0.347 |
| <b>W-Area</b>             | 142.091±193.520  | 133.287±161.378  | 0.758 |
| <b>W-Volume</b>           | 255.038±445.507  | 218.210±316.000  | 0.563 |
| <b>W-Median</b>           | -163.971±278.803 | -155.583±255.981 | 0.843 |
| <b>W-Maximum</b>          | 173.680±350.142  | 169.200±405.687  | 0.938 |
| <b>W-Minimum</b>          | -590.240±257.365 | -556.000±278.079 | 0.403 |

\*p<0.05

Table S3 Comparison of morphological features of lung metastasis (PM) and non- metastasis (NM) in the training and validation datasets

| Characteristics | Training dataset |              |        | Validation dataset |             |        |
|-----------------|------------------|--------------|--------|--------------------|-------------|--------|
|                 | NM               | PM           | p      | NM                 | PM          | p      |
| Age             | 59.82±10.530     | 58.17±11.360 | 0.382  | 58.54±12.188       | 56.06±9.055 | 0.372  |
| Gender          |                  |              | 0.676  |                    |             | 0.316  |
| 1               | 42(57.5%)        | 34(54.0%)    |        | 13(46.4%)          | 19(59.4%)   |        |
| 2               | 31(42.5%)        | 29(46.0%)    |        | 15(53.6%)          | 13(40.6%)   |        |
| Primary tumor   |                  |              | 0.082  |                    |             | 0.198  |
| 1               | 21(28.8%)        | 11(17.5%)    |        | 10(35.7%)          | 5(15.6%)    |        |
| 2               | 16(21.9%)        | 9(14.3%)     |        | 3(10.7%)           | 5(15.6%)    |        |
| 3               | 36(49.3%)        | 43(68.3%)    |        | 15(53.6%)          | 22(68.8%)   |        |
| Distribution    |                  |              | 0.091  |                    |             | 0.042* |
| 1               | 59(80.8%)        | 43(68.3%)    |        | 24(85.7%)          | 20(62.5%)   |        |
| 2               | 14(19.2%)        | 20(31.7%)    |        | 4(14.3%)           | 12(37.5%)   |        |
| Lobe location   |                  |              | 0.025* |                    |             | 0.507  |
| 1               | 12(16.4%)        | 19(30.2%)    |        | 7(25.0%)           | 6(18.8%)    |        |
| 2               | 12(16.4%)        | 10(15.9%)    |        | 4(14.3%)           | 10(31.3%)   |        |
| 3               | 23(31.5%)        | 9(14.3%)     |        | 8(28.6%)           | 5(15.6%)    |        |
| 4               | 12(16.4%)        | 5(7.9%)      |        | 1(3.6%)            | 1(3.1%)     |        |
| 5               | 14(19.2%)        | 20(31.7%)    |        | 8(28.6%)           | 10(31.3%)   |        |
| Nodules number  |                  |              | 0.886  |                    |             | 0.169  |
| 1               | 32(43.8%)        | 25(39.7%)    |        | 11(39.3%)          | 11(34.4%)   |        |
| 2               | 17(23.3%)        | 16(25.4%)    |        | 9(32.1%)           | 5(15.6%)    |        |

|                     |             |              |         |             |              |         |
|---------------------|-------------|--------------|---------|-------------|--------------|---------|
| 3                   | 24(32.9%)   | 22(34.9%)    |         | 8(28.6%)    | 16(50.0%)    |         |
| Size category       |             |              | <0.001* | (0.0%)      | (0.0%)       | 0.095   |
| 1                   | 56(76.7%)   | 22(34.9%)    |         | 20(71.4%)   | 14(43.8%)    |         |
| 2                   | 10(13.7%)   | 24(38.1%)    |         | 4(14.3%)    | 10(31.3%)    |         |
| 3                   | 7(9.6%)     | 17(27.0%)    |         | 4(14.3%)    | 8(25.0%)     |         |
| Long-axis diameter  | 8.988±3.493 | 12.662±4.200 | <0.001* | 9.221±4.422 | 11.819±4.180 | 0.023*  |
| Short-axis diameter | 5.825±2.144 | 9.611±9.253  | 0.001*  | 5.682±2.031 | 8.184±3.071  | <0.001* |
| Density             |             |              | <0.001* |             |              | 0.002*  |
| 1                   | 12(16.4%)   | 0(0.0%)      |         | 6(21.4%)    | 0(0.0%)      |         |
| 2                   | 15(20.5%)   | 2(3.2%)      |         | 6(21.4%)    | 2(6.3%)      |         |
| 3                   | 46(63.0%)   | 61(96.8%)    |         | 16(57.1%)   | 30(93.8%)    |         |
| Calcification       |             |              | 0.059   |             |              | 0.281   |
| 0                   | 69(94.5%)   | 63(100.0%)   |         | 27(96.4%)   | 32(100.0%)   |         |
| 1                   | 4(5.5%)     | 0(0.0%)      |         | 1(3.6%)     | 0(0.0%)      |         |
| Contour             |             |              | 0.043*  |             |              | 0.011*  |
| 1                   | 2(2.7%)     | 10(15.9%)    |         | 1(3.6%)     | 1(3.1%)      |         |
| 2                   | 21(28.8%)   | 20(31.7%)    |         | 2(7.1%)     | 8(25.0%)     |         |
| 3                   | 29(39.7%)   | 19(30.2%)    |         | 11(39.3%)   | 19(59.4%)    |         |
| 4                   | 21(28.8%)   | 14(22.2%)    |         | 14(50.0%)   | 4(12.5%)     |         |
| Lobulation          |             |              | 0.267   |             |              | 0.179   |
| 0                   | 40(54.8%)   | 26(41.3%)    |         | 15(53.6%)   | 10(31.3%)    |         |
| 1                   | 18(24.7%)   | 17(27.0%)    |         | 6(21.4%)    | 10(31.3%)    |         |
| 2                   | 10(13.7%)   | 10(15.9%)    |         | 3(10.7%)    | 9(28.1%)     |         |
| 3                   | 5(6.8%)     | 10(15.9%)    |         | 4(14.3%)    | 3(9.4%)      |         |
| Border              |             |              | <0.001* |             |              | <0.001* |



|                    |           |           |        |            |           |       |
|--------------------|-----------|-----------|--------|------------|-----------|-------|
| 1                  | 28(38.4%) | 2(3.2%)   |        | 13(46.4%)  | 1(3.1%)   |       |
| 2                  | 24(32.9%) | 43(68.3%) |        | 10(35.7%)  | 20(62.5%) |       |
| 3                  | 21(28.8%) | 18(28.6%) |        | 5(17.9%)   | 11(34.4%) |       |
| Spiculation        |           |           | 0.217  |            |           | 0.363 |
| 0                  | 39(53.4%) | 37(58.7%) |        | 18(64.3%)  | 21(65.6%) |       |
| 1                  | 34(46.6%) | 24(38.1%) |        | 10(35.7%)  | 9(28.1%)  |       |
| 2                  | 0(0.0%)   | 2(3.2%)   |        | 0(0.0%)    | 2(6.3%)   |       |
| Air bronchogram    |           |           | 0.032* |            |           | 0.178 |
| 0                  | 72(98.6%) | 57(90.5%) |        | 28(100.0%) | 30(93.8%) |       |
| 1                  | 1(1.4%)   | 6(9.5%)   |        | 0(0.0%)    | 2(6.3%)   |       |
| Concavity          |           |           | 0.127  |            |           | 0.268 |
| 1                  | 55(75.3%) | 50(79.4%) |        | 24(85.7%)  | 25(78.1%) |       |
| 2                  | 12(16.4%) | 4(6.3%)   |        | 3(10.7%)   | 2(6.3%)   |       |
| 3                  | 6(8.2%)   | 9(14.3%)  |        | 1(3.6%)    | 5(15.6%)  |       |
| Vocule sign        |           |           | 0.136  |            |           | 0.698 |
| 0                  | 60(82.2%) | 45(71.4%) |        | 23(82.1%)  | 25(78.1%) |       |
| 1                  | 13(17.8%) | 18(28.6%) |        | 5(17.9%)   | 7(21.9%)  |       |
| Fissure attachment |           |           | 0.121  |            |           | 0.49  |
| 0                  | 64(87.7%) | 60(95.2%) |        | 26(92.9%)  | 28(87.5%) |       |
| 1                  | 9(12.3%)  | 3(4.8%)   |        | 2(7.1%)    | 4(12.5%)  |       |
| Pleural attachment |           |           | 0.596  |            |           | 0.967 |
| 0                  | 47(64.4%) | 37(58.7%) |        | 22(78.6%)  | 25(78.1%) |       |
| 1                  | 26(35.6%) | 26(41.3%) |        | 6(21.4%)   | 7(21.9%)  |       |
| Pleural retraction |           |           | 0.252  |            |           | 0.885 |
| 0                  | 57(78.1%) | 54(85.7%) |        | 24(85.7%)  | 27(84.4%) |       |

|                      |             |             |        |             |             |       |
|----------------------|-------------|-------------|--------|-------------|-------------|-------|
| 1                    | 16(21.9%)   | 9(14.3%)    |        | 4(14.3%)    | 5(15.6%)    |       |
| Vascular convergence |             |             | 0.092  |             |             | 0.284 |
| 0                    | 43(58.9%)   | 28(44.4%)   |        | 17(60.7%)   | 15(46.9%)   |       |
| 1                    | 30(41.1%)   | 35(55.6%)   |        | 11(39.3%)   | 17(53.1%)   |       |
| Lymphadenopathy      |             |             | 0.032* |             |             | 0.369 |
| 0                    | 72(98.6%)   | 57(90.5%)   |        | 27(96.4%)   | 29(90.6%)   |       |
| 1                    | 1(1.4%)     | 6(9.5%)     |        | 1(3.6%)     | 3(9.4%)     |       |
| Enhancement degree   | 0.011±0.036 | 0.271±0.632 | 0.459  | 0.035±0.116 | 0.284±1.652 | 0.398 |

Note: Chi-square tests were used to compare the differences in categorical variables while a two-sample t-test was used to compare the differences in continuous variables.

Abbreviations: NM, non-metastasis group; PM, lung metastasis group.

**Table S4 Inter-observer variability of CT morphological features**

| <b>Characteristics</b>      | <b>ICC</b> | <b>95%CI</b> |
|-----------------------------|------------|--------------|
| <b>Distribution</b>         | 1          | 1.000-1.000  |
| <b>Lobe location</b>        | 1          | 1.000-1.000  |
| <b>Nodules number</b>       | 1          | 1.000-1.000  |
| <b>Size category</b>        | 0.996      | 0.994-0.997  |
| <b>Long-axis diameter</b>   | 0.961      | 0.948-0.970  |
| <b>Short-axis diameter</b>  | 0.936      | 0.916-0.952  |
| <b>Density</b>              | 0.883      | 0.847-0.910  |
| <b>Calcification</b>        | 1          | 1.000-1.000  |
| <b>Contour</b>              | 0.834      | 0.785-0.872  |
| <b>Lobulation</b>           | 0.907      | 0.879-0.929  |
| <b>Border</b>               | 0.779      | 0.717-0.829  |
| <b>Spiculation</b>          | 0.758      | 0.692-0.812  |
| <b>Air bronchogram</b>      | 0.896      | 0.864-0.920  |
| <b>Concavity</b>            | 0.957      | 0.953-0.973  |
| <b>Vocule sign</b>          | 0.741      | 0.670-0.798  |
| <b>Fissure attachment</b>   | 0.843      | 0.797-0.897  |
| <b>Pleural attachment</b>   | 0.943      | 0.925-0.956  |
| <b>Pleural retraction</b>   | 0.803      | 0.746-0.803  |
| <b>Vascular convergence</b> | 0.89       | 0.856-0.916  |
| <b>Lymphadenopathy</b>      | 0.95       | 0.934-0.962  |
| <b>Enhancement degree</b>   | 0.747      | 0.677-0.893  |
